# Supplementary material for: Green synthesis of N,S-doped carbon dots for tartrazine detection and their antibacterial activities
Source: Royal Society of Chemistry journal article supplement (doi:10.1039/d3an01609a), 2023-01-01
Supplement: d3an01609a1.pdf [file d3an01609a1.pdf]

# Green Synthesis of N,S-Doped Carbon Dots for Tartrazine Detection and Antibacterial Activity

*Tanmayee Mohanta,<sup>a</sup> Himadri Gourav Behuria,<sup>b</sup> Santosh Kumar Sahu, <sup>b</sup>Ashis Kumar Jena<sup>a,\*</sup>  
and Swagatika Sahu<sup>c,\*</sup>*

<sup>a</sup>Department of Chemistry, Maharaja Sriram Chandra Bhanja Deo University (Erstwhile North Orissa University), Baripada-757 003, Odisha

<sup>b</sup>Department of Biotechnology, Maharaja Sriram Chandra Bhanja Deo University (Erstwhile North Orissa University), Baripada-757 003, Odisha

<sup>c</sup>Department of Chemistry, Maharaja Purna Chandra (Autonomous) College, Baripada-757 003, Odisha

## Synthesis of Pyrazole derivative

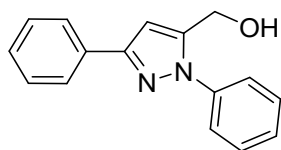

Following our previously reported procedure, we have synthesized the pyrazole derivative for selectivity experiments.<sup>1</sup>

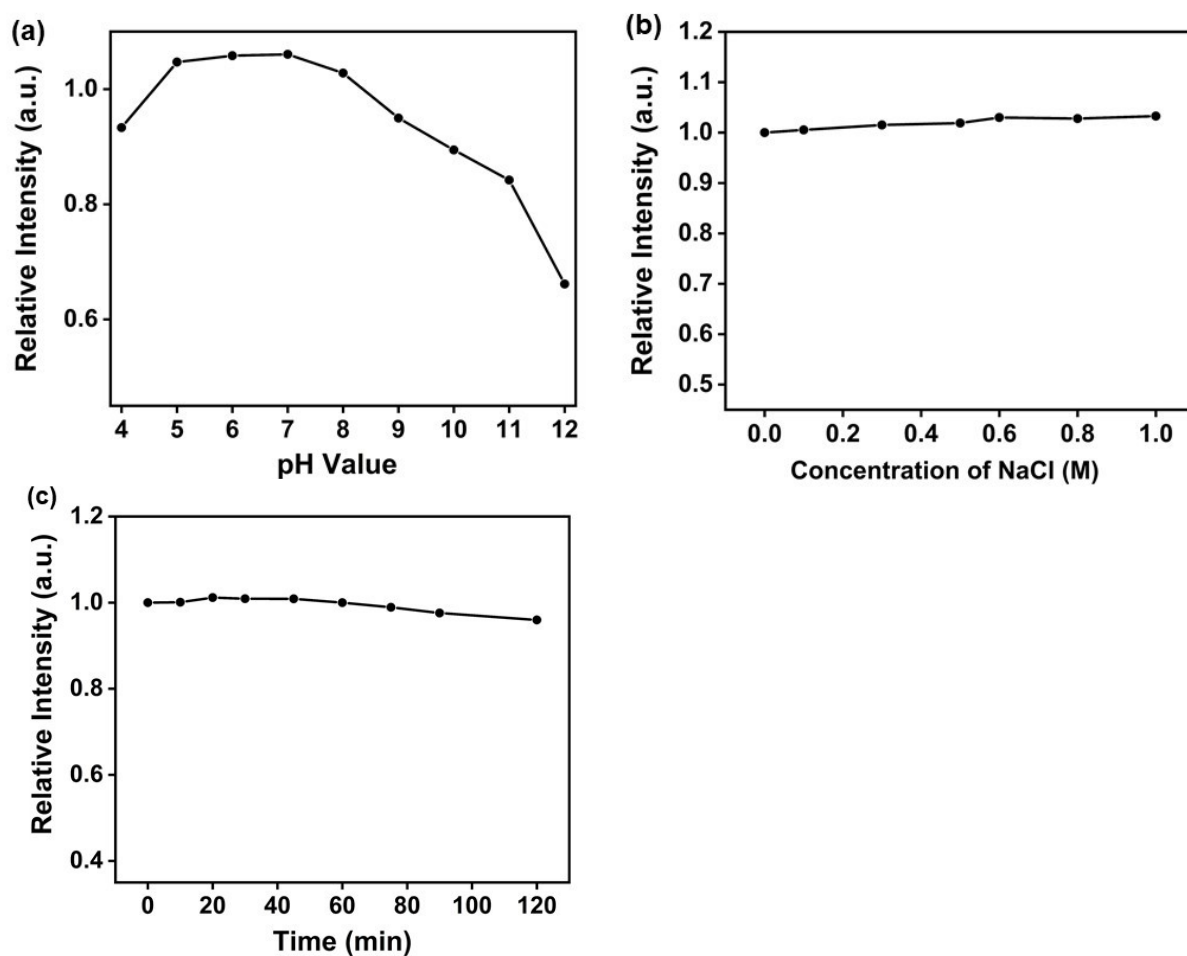

**Fig. S1**(a) The pH effect on FL intensity of the N,S-CDs. (b) Effect of ionic strength of N,S-CDs at different concentrations of NaCl. (c) Effect of UV light irradiation on N,S-CDs

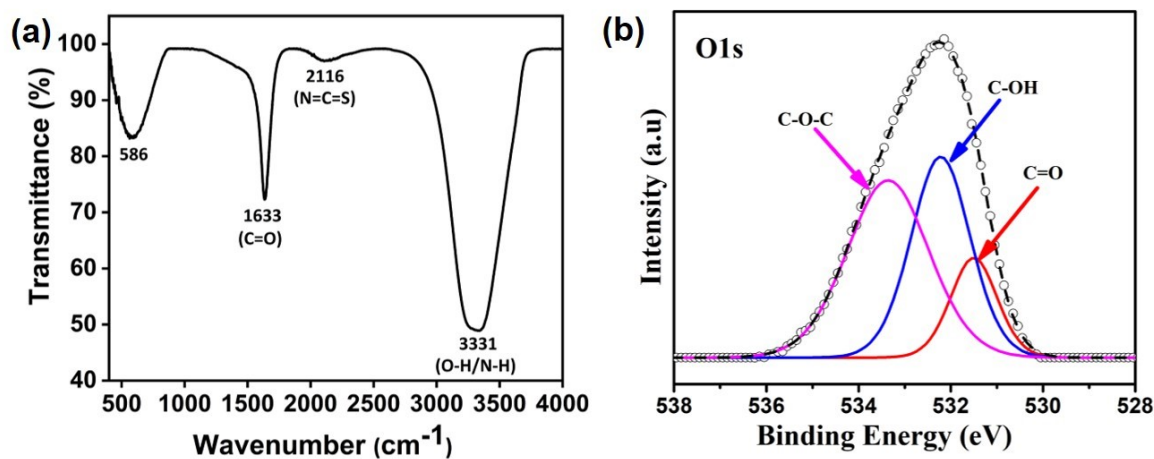

Fig. S2 (a) FTIR Spectrum, and (b) high resolution scan of O1s region of N,S-CDs

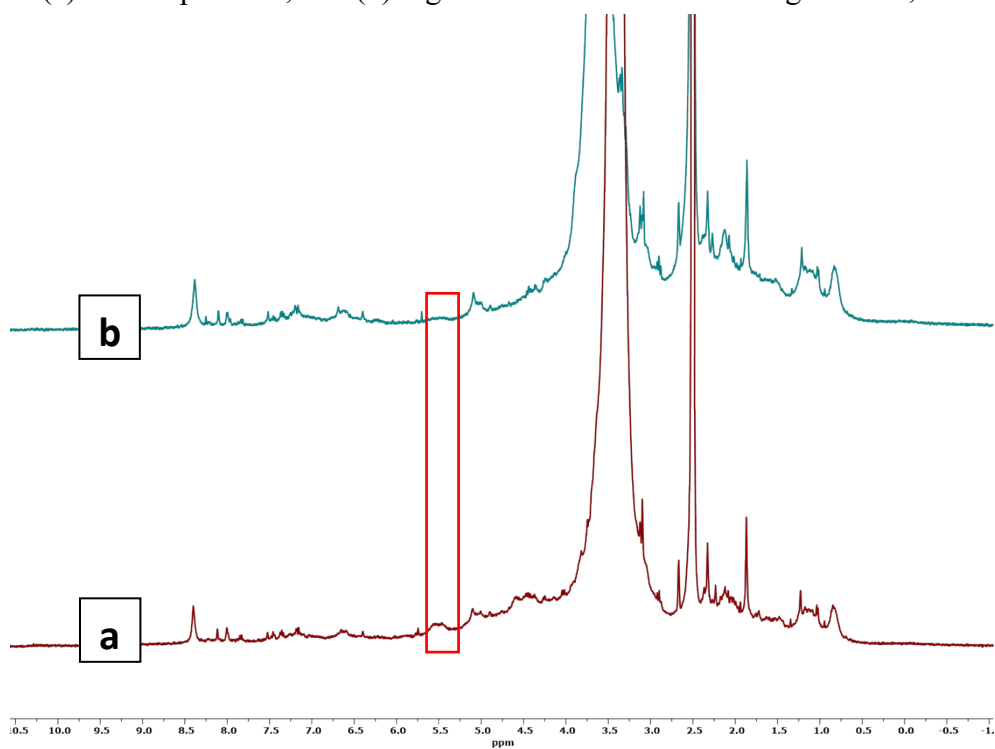

Fig. S3 <sup>1</sup>H NMR spectra of N,S-CDs (a) without and (b) with D<sub>2</sub>O addition

| Functional Groups                    | <sup>1</sup> H NMR Peaks (PPM) | <sup>1</sup> H NMR Peaks with D <sub>2</sub> O addition (PPM) |
|--------------------------------------|--------------------------------|---------------------------------------------------------------|
| C-H                                  | 1-3                            | 1-3                                                           |
| N-H                                  | 5.5                            | --                                                            |
| C=C and other sp <sup>2</sup> carbon | 6-8                            | 6-8                                                           |
| C=O                                  | 8-8.5                          | 8-8.5                                                         |

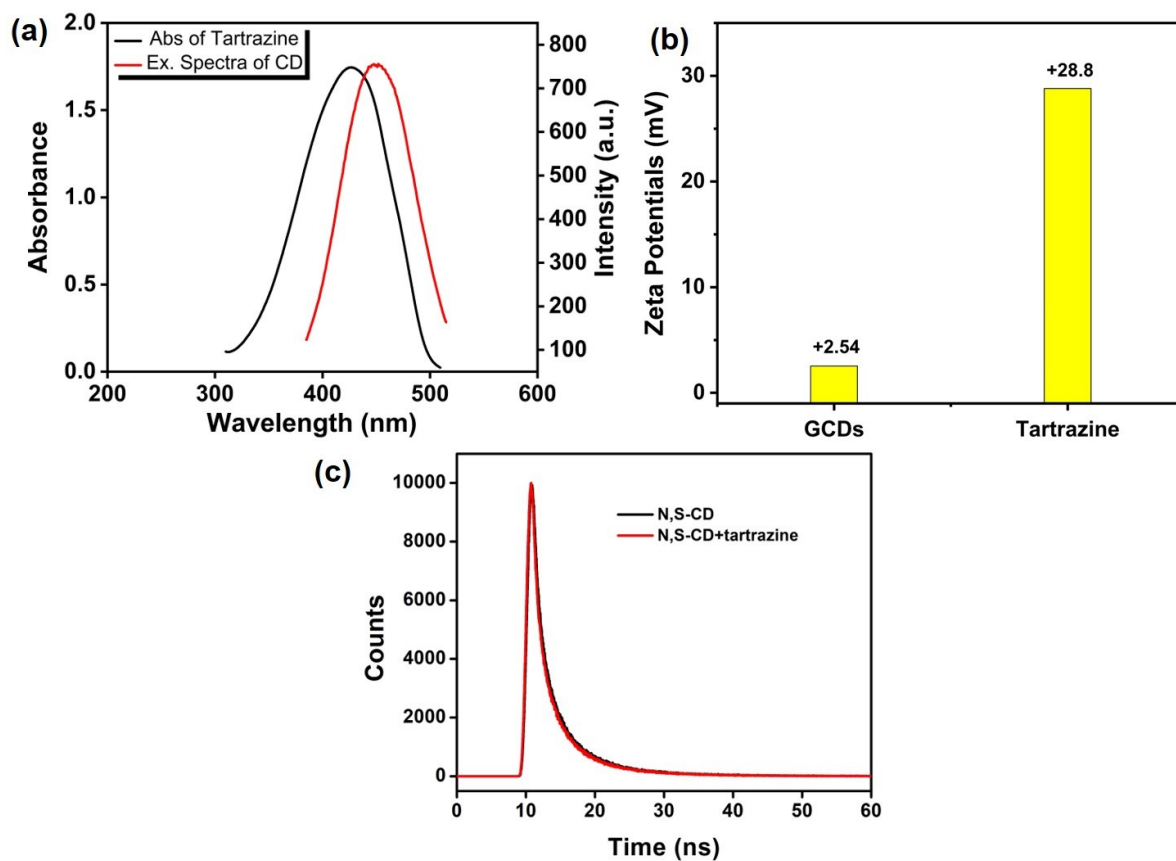

**Fig. S4** (a) Absorption spectra of Tartrazine (black line) and Excitation spectra of N,S-CDs (red line), (b) Zeta potentials of N,S-CDs and Tartrazine, (c) Time Resolved Decay of N,S-CD without and with addition of Tartrazine.

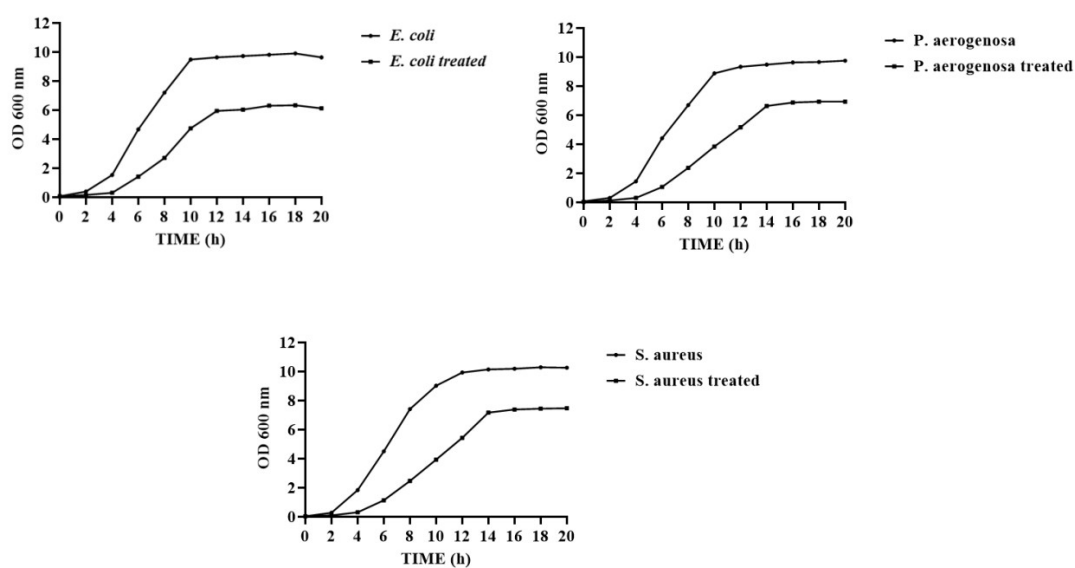

**Fig. S5** Bacterial growth inhibitory effect of N,S-CDs

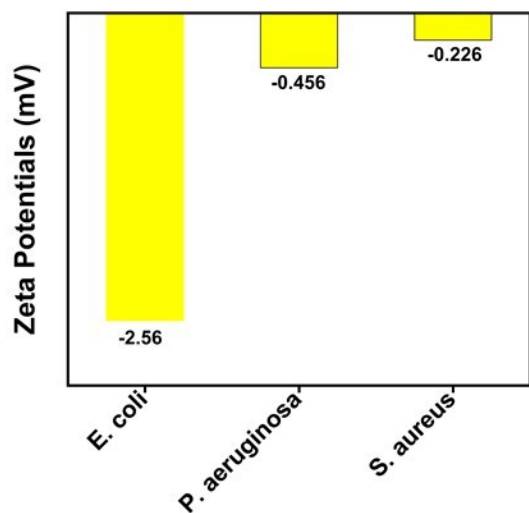

**Fig. S6** Zeta potentials of E.coli, P. aeruginosa and S. Aureus

#### References

1. C. Pal and A. K. Jena, *Org. Biomol. Chem.*, 2023, **21**, 59-64.
